# Supplementary material
Source: PubMed Central journal article supplement (PMC4011985)
Supplement: NIHMS567368-supplement-01.pdf [file NIHMS567368-supplement-01.pdf]

**Supplementary Table 1. Associations of 25-hydroxyvitamin D Concentration with Hypertensive Disorders of Pregnancy; Average of 2 assays compared to individual assays (manual radioimmunoassay and automated chemiluminescence). Project Viva, n=1591.**

|                                               |                                    | Average of Manual and<br>Automatic Assays<br>OR (95% CI) | Manual<br>Radioimmunoassay<br>OR (95% CI) | Automated<br>Chemiluminescence<br>OR (95% CI) |
|-----------------------------------------------|------------------------------------|----------------------------------------------------------|-------------------------------------------|-----------------------------------------------|
| <b><u>Preeclampsia Models</u></b>             |                                    |                                                          |                                           |                                               |
| <b>Continuous 25(OH)D</b>                     |                                    |                                                          |                                           |                                               |
| Model 1                                       | Continuous 25(OH)D (per 25 nmol/L) | 0.89 (0.62, 1.26)                                        | 0.96 (0.69, 1.34)                         | 0.83 (0.59, 1.18)                             |
| Model 2                                       | Continuous 25(OH)D (per 25 nmol/L) | 0.94 (0.64, 1.39)                                        | 1.02 (0.72, 1.46)                         | 0.87 (0.60, 1.28)                             |
| Model 3                                       | Continuous 25(OH)D (per 25 nmol/L) | 1.15 (0.79, 1.69)                                        | 1.21 (0.85, 1.71)                         | 1.06 (0.73, 1.54)                             |
| Model 4                                       | Continuous 25(OH)D (per 25 nmol/L) | 1.14 (0.77, 1.67)                                        | 1.19 (0.84, 1.69)                         | 1.05 (0.72, 1.53)                             |
| <b>Categorical 25(OH)D</b>                    |                                    |                                                          |                                           |                                               |
| Model 1                                       | < 25 nmol/L                        | 1.30 (0.37, 4.53)                                        | 1.91 (0.54, 6.71)                         | 1.57 (0.67, 3.68)                             |
|                                               | 25 - < 50 nmol/L                   | 1.03 (0.52, 2.05)                                        | 1.04 (0.48, 2.28)                         | 0.66 (0.32, 1.37)                             |
|                                               | 50 - < 75 nmol/L                   | 1.0 (ref)                                                | 1.0 (ref)                                 | 1.0 (ref)                                     |
|                                               | ≥ 75 nmol/L                        | 1.12 (0.52, 2.42)                                        | 1.26 (0.64, 2.47)                         | 1.16 (0.50, 2.71)                             |
| Model 2                                       | < 25 nmol/L                        | 1.08 (0.28, 4.23)                                        | 1.73 (0.45, 6.67)                         | 1.54 (0.60, 3.93)                             |
|                                               | 25 - < 50 nmol/L                   | 0.97 (0.47, 1.98)                                        | 0.98 (0.43, 2.22)                         | 0.64 (0.30, 1.35)                             |
|                                               | 50 - < 75 nmol/L                   | 1.0 (ref)                                                | 1.0 (ref)                                 | 1.0 (ref)                                     |
|                                               | ≥ 75 nmol/L                        | 1.16 (0.53, 2.55)                                        | 1.36 (0.69, 2.70)                         | 1.29 (0.54, 3.04)                             |
| Model 3                                       | < 25 nmol/L                        | 0.57 (0.13, 2.44)                                        | 0.91 (0.21, 3.89)                         | 0.91 (0.33, 2.48)                             |
|                                               | 25 - < 50 nmol/L                   | 0.78 (0.37, 1.61)                                        | 0.79 (0.35, 1.81)                         | 0.52 (0.24, 1.11)                             |
|                                               | 50 - < 75 nmol/L                   | 1.0 (ref)                                                | 1.0 (ref)                                 | 1.0 (ref)                                     |
|                                               | ≥ 75 nmol/L                        | 1.33 (0.59, 2.99)                                        | 1.51 (0.75, 3.03)                         | 1.38 (0.57, 3.35)                             |
| Model 4                                       | < 25 nmol/L                        | 0.60 (0.14, 2.56)                                        | 0.96 (0.23, 4.11)                         | 0.92 (0.33, 2.53)                             |
|                                               | 25 - < 50 nmol/L                   | 0.79 (0.38, 1.65)                                        | 0.80 (0.35, 1.84)                         | 0.51 (0.24, 1.11)                             |
|                                               | 50 - < 75 nmol/L                   | 1.0 (ref)                                                | 1.0 (ref)                                 | 1.0 (ref)                                     |
|                                               | ≥ 75 nmol/L                        | 1.34 (0.60, 3.01)                                        | 1.49 (0.74, 3.00)                         | 1.37 (0.56, 3.30)                             |
| <b><u>Gestational Hypertension Models</u></b> |                                    |                                                          |                                           |                                               |
| <b>Continuous 25(OH)D</b>                     |                                    |                                                          |                                           |                                               |
| Model 1                                       | Continuous 25(OH)D (per 25 nmol/L) | 1.25 (0.98, 1.58)                                        | 1.24 (0.99, 1.56)                         | 1.20 (0.96, 1.50)                             |
| Model 2                                       | Continuous 25(OH)D (per 25 nmol/L) | 1.18 (0.91, 1.54)                                        | 1.18 (0.92, 1.52)                         | 1.14 (0.90, 1.46)                             |
| Model 3                                       | Continuous 25(OH)D (per 25 nmol/L) | 1.31 (1.00, 1.70)                                        | 1.28 (0.99, 1.65)                         | 1.26 (0.98, 1.61)                             |
| Model 4                                       | Continuous 25(OH)D (per 25 nmol/L) | 1.32 (1.01, 1.72)                                        | 1.29 (1.00, 1.66)                         | 1.27 (0.99, 1.62)                             |
| <b>Categorical 25(OH)D</b>                    |                                    |                                                          |                                           |                                               |
| Model 1                                       | < 25 nmol/L                        | 0.33 (0.05, 2.13)                                        | 0.32 (0.05, 2.19)                         | 0.67 (0.26, 1.75)                             |
|                                               | 25 - < 50 nmol/L                   | 1.08 (0.66, 1.78)                                        | 0.58 (0.32, 1.06)                         | 1.13 (0.70, 1.84)                             |
|                                               | 50 - < 75 nmol/L                   | 1.0 (ref)                                                | 1.0 (ref)                                 | 1.0 (ref)                                     |
|                                               | > 75 nmol/L                        | 1.39 (0.79, 2.43)                                        | 0.90 (0.55, 1.45)                         | 1.44 (0.76, 2.74)                             |
| Model 2                                       | < 25 nmol/L                        | 0.47 (0.07, 3.24)                                        | 0.42 (0.06, 3.14)                         | 0.92 (0.34, 2.53)                             |
|                                               | 25 - < 50 nmol/L                   | 1.16 (0.69, 1.95)                                        | 0.62 (0.34, 1.16)                         | 1.18 (0.71, 1.94)                             |
|                                               | 50 - < 75 nmol/L                   | 1.0 (ref)                                                | 1.0 (ref)                                 | 1.0 (ref)                                     |
|                                               | > 75 nmol/L                        | 1.37 (0.78, 2.42)                                        | 0.89 (0.54, 1.46)                         | 1.38 (0.72, 2.64)                             |
| Model 3                                       | < 25 nmol/L                        | 0.36 (0.05, 2.54)                                        | 0.32 (0.04, 2.38)                         | 0.75 (0.27, 2.09)                             |
|                                               | 25 - < 50 nmol/L                   | 1.02 (0.60, 1.72)                                        | 0.54 (0.29, 1.01)                         | 1.04 (0.62, 1.73)                             |
|                                               | 50 - < 75 nmol/L                   | 1.0 (ref)                                                | 1.0 (ref)                                 | 1.0 (ref)                                     |
|                                               | > 75 nmol/L                        | 1.46 (0.82, 2.60)                                        | 0.94 (0.57, 1.55)                         | 1.44 (0.75, 2.79)                             |
| Model 4                                       | < 25 nmol/L                        | 0.34 (0.05, 2.40)                                        | 0.30 (0.04, 2.29)                         | 0.70 (0.25, 1.97)                             |
|                                               | 25 - < 50 nmol/L                   | 0.98 (0.57, 1.66)                                        | 0.52 (0.27, 0.98)                         | 1.02 (0.61, 1.70)                             |
|                                               | 50 - < 75 nmol/L                   | 1.0 (ref)                                                | 1.0 (ref)                                 | 1.0 (ref)                                     |
|                                               | ≥ 75 nmol/L                        | 1.46 (0.82, 2.60)                                        | 0.93 (0.56, 1.53)                         | 1.43 (0.74, 2.77)                             |

**Model 1.** Unadjusted**Model 2.** Adjusted for maternal age, race/ethnicity, smoking, education, marital status, parity, season of last menstrual period, and gestational age at blood draw**Model 3.** Model 2 + pre-pregnancy BMI and gestational weight gain (up to the time of blood collection)**Model 4.** Model 3 + 2<sup>nd</sup> trimester physical activity and 2<sup>nd</sup> trimester dietary intakes of fish and calcium**Abbreviations:** 25(OH)D, 25-hydroxyvitamin D; BMI, body mass index; CI, confidence interval; OR, odds ratio
